# Supplementary material
Source: Research Square preprint supplement (doi:10.21203/rs.3.rs-9111343/v1)
Supplement: Supplementary file 1 [file 95c8adf0db632575311ff878.docx]

**Table S1. Normality Test Results for All Datasets.**

| **Variable** | **Normality test** | **Test statistics (W)** | **P-value** | **Distribution** |
| --- | --- | --- | --- | --- |
| Body weight | Shapiro–Wilk | 0.9064 | 0.0635 | Normal |
| FBG | Shapiro–Wilk | 0.9751 | 0.7922 | Normal |
| FI | Shapiro–Wilk | 0.9346 | 0.2101 | Normal |
| HOMA2-IR | Shapiro–Wilk | 0.9682 | 0.8679 | Normal |
| OFT | Shapiro–Wilk | 0.8631 | 0.0534 | Normal |
| EPM | Shapiro–Wilk | 0.8910 | 0.1214 | Normal |
| RAWM | Shapiro–Wilk | 0.8887 | 0.1341 | Normal |
| Hippocampus markers | Shapiro–Wilk | 0.9488 | 0.6282 | Normal |
| Serum markers | Shapiro–Wilk | 0.9422 | 0.5462 | Normal |

Normality was assessed using Shapiro–Wilk test, p value more than 0.05 indicate normal distribution.


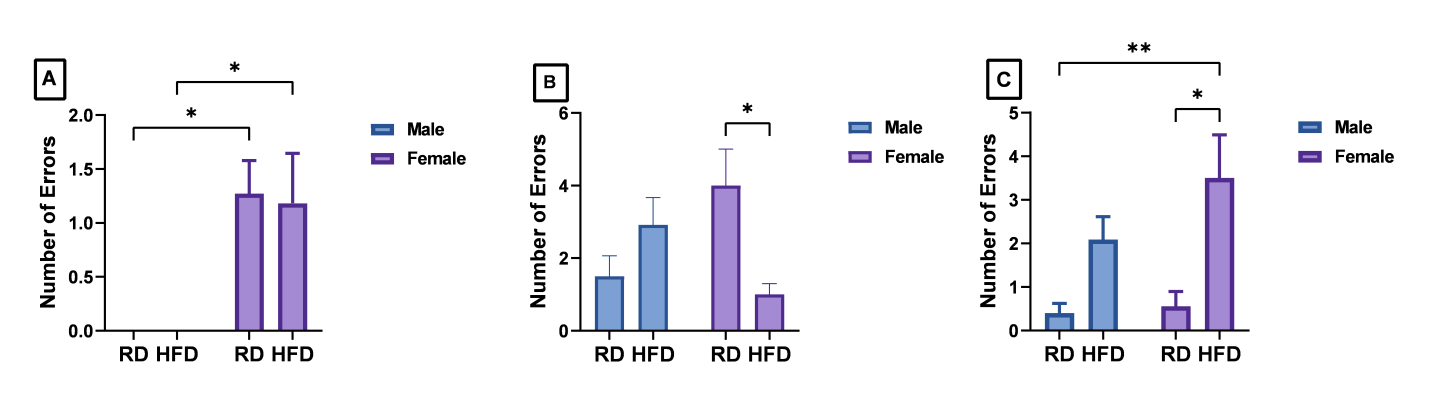


**Figure S2.** Sensitivity Analysis of RAWM Test.

Rat memory performance was assessed at (A) 30 min, (B) 5 h, and (C) 24 h post-training. Normality was assessed using the Shapiro–Wilk test and Q–Q plots. As all data were normally distributed, two-way ANOVA followed by Tukey’s multiple comparisons test was performed and revealed the following: (A) only sex (but not diet) has a significant effect (F (1, 39) = 18.64, *p* = 0.0001). (B) Unlike male rat groups, HFDF rats made significantly lower errors than RDF rats (F (1, 39) = 9.099, *p* = 0.0045). (C) HFD rats of both sexes committed significantly more errors than RD rats (F (1, 39) = 12.38, *p* = 0.0011). RDM: regular diet male; RDF: regular diet female; HFDM: high-fat, high-fructose diet male; HFDF: high-fat, high-fructose diet female. Data represent mean ± SEM of N = 11–12 rats per group.
